# Supplementary material for: Fabrication of hierarchically mesoporous CuO nanostructures and their role as heterogenous catalysts and sensors
Source: Royal Society of Chemistry journal article supplement (doi:10.1039/c6ra07307g), 2016-01-01
Supplement: c6ra07307g1.pdf [file c6ra07307g1.pdf]

Supplementary data

**Fabrication of hierarchically mesoporous CuO nanostructures and their role as heterogenous catalysts and sensors.**

Mehraj Ud Din Sheikh,<sup>a</sup> Gowhar Ahmad Naikoo,<sup>a</sup> Molly Thomas,<sup>a</sup> Mustri Bano,<sup>a</sup> Devender Ahirwar,<sup>a</sup> Umar Jan Pandit<sup>b</sup> and Farid Khan\*<sup>a</sup>

*<sup>a</sup>Nanomaterials Discovery Laboratory, Department of Chemistry, Dr. Harisingh Gour University, Sagar (M.P)-470003, India, Email:faridkhan58@yahoo.com, contact: +919425626334*

*<sup>b</sup>Electroanalytical Laboratory, Department of Chemistry, Dr. Harisingh Gour University, Sagar (M.P)-470003.*

**\*Corresponding authors at: -**

Department of Chemistry, Dr. Hari Singh Gour Central University, Sagar- 470003 Email id: [faridkhan58@yahoo.com/mehrajdavood@gmail.com](mailto:faridkhan58@yahoo.com/mehrajdavood@gmail.com), Phone:- +91-9425626334/9407114504

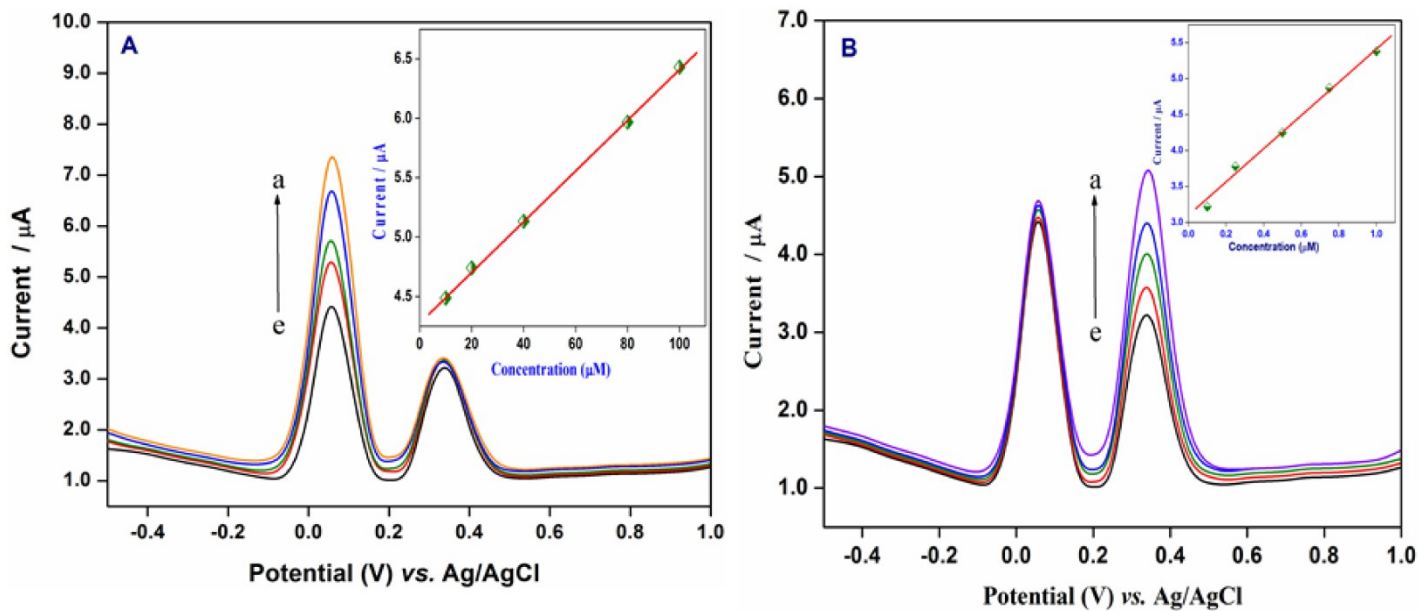

**Figure S1** (A) DPV graphs of (a) 100  $\mu\text{M}$ , (b) 80  $\mu\text{M}$ , (c) 40  $\mu\text{M}$ , (d) 20  $\mu\text{M}$  and (e) 10  $\mu\text{M}$  AA in 0.1 M Phosphate buffer (pH 4.0±0.05) containing 1 $\mu\text{M}$  UA (B) DPV graphs of (a) 1.0  $\mu\text{M}$ , (b) 0.7  $\mu\text{M}$ , (c) 0.5  $\mu\text{M}$ , (d) 0.3  $\mu\text{M}$  and (e) 0.1  $\mu\text{M}$  UA in 0.1 M Phosphate buffer (pH 4.0±0.05) containing 10  $\mu\text{M}$  AA at the CuO/Si-NPs modified CPE. **Inset:** Respective calibration plots.

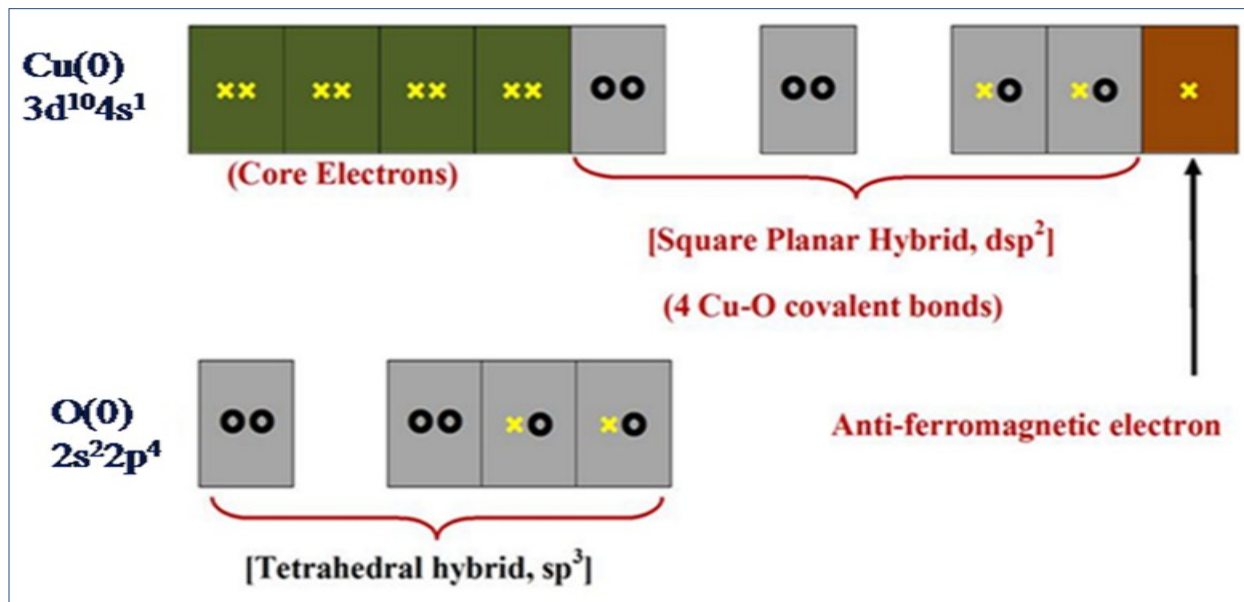

Fig. S2 Electronic structure of CuO
